# Supplementary material for: Is lecture dead? A preliminary study of medical students’ evaluation of teaching methods in the preclinical curriculum
Source: PubMed Central journal article supplement (PMC5699863; doi:10.5116/ijme.59b9.5f40), 2017-09-22
Supplement: ijme-8-326-S1.pdf [file ijme-8-326-S1.pdf]

**Appendix 1**

UASOM Preclinical Curriculum

| Month               | July                                                             | August                                                           | September                         | October       | November   | December                          | January | February     | March                             | April     | May          | June                          |       |                       |
|---------------------|------------------------------------------------------------------|------------------------------------------------------------------|-----------------------------------|---------------|------------|-----------------------------------|---------|--------------|-----------------------------------|-----------|--------------|-------------------------------|-------|-----------------------|
| No. of module weeks | [Grid of 12 columns and 4 rows of small squares]                 |                                                                  |                                   |               |            |                                   |         |              |                                   |           |              |                               |       |                       |
| MS-1 Year           | Patient, Doctor and Society<br>Introduction to Clinical Medicine | Patient, Doctor and Society<br>Introduction to Clinical Medicine | Fundamentals of Medicine          |               | Fall Break | Fundamentals of Medicine          |         | Winter Break | Cardiovascular                    | Pulmonary | Spring Break | Gastrointestinal              | Renal | Summer Break          |
| No. of module weeks | [Grid of 12 columns and 4 rows of small squares]                 |                                                                  |                                   |               |            |                                   |         |              |                                   |           |              |                               |       |                       |
| MS-2 Year           | Summer Break (Continued)                                         |                                                                  | Musculoskeletal & Skin            | Neurosciences | Fall Break | Neurosciences (Continued)         |         | Winter Break | Hematology /Oncology              | Endocrine | Reproduction | STEP 1/ Transition Activities |       | Third year clerkships |
|                     |                                                                  |                                                                  | Introduction to Clinical Medicine |               |            | Introduction to Clinical Medicine |         |              | Introduction to Clinical Medicine |           |              |                               |       |                       |
