# Supplementary material for: Is lecture dead? A preliminary study of medical students’ evaluation of teaching methods in the preclinical curriculum
Source: PubMed Central journal article supplement (PMC5699863; doi:10.5116/ijme.59b9.5f40), 2017-09-22
Supplement: ijme-8-326-S2.pdf [file ijme-8-326-S2.pdf]

## Appendix 2

Definitions of 8 instructional methods provided in survey<sup>23</sup>

**Lecture** – an instruction by a speaker before a large group of learners

**Team-based Learning (TBL)** – a form of collaborative learning that follows a specific sequence of individual work and group work; engages learners in activities within a small group that works independently in classes with high learner-faculty ratios

**Small Group Case-based Learning (CBL)** –the use of patient cases to stimulate discussion, questioning, problem solving, and reasoning on issues pertaining to the basic sciences and clinical disciplines [less than 12 learners]

**Large Group Case-based Learning (CBL)** –the use of patient cases to stimulate discussion, questioning, problem solving, and reasoning on issues pertaining to the basic sciences and clinical disciplines [greater than 12 learners]

**Laboratory** – hands-on or simulated exercises including anatomy lab, histology lab, and microbiology lab

**Simulation** – a method used to replace or amplify real patient encounters with scenarios designed to replicate real health care situations, using lifelike mannequins, physical models, standardized patients, or computers

**Patient Presentation by Faculty** – a presentation by faculty of patient findings, history and physical, differential diagnosis, treatment plan, etc.

**Peer Teaching** – learner-to-learner instruction for the mutual learning experience of both “teacher” and “learner”
